# Supplementary material for: Progression risk assessments of individual non-invasive gastric neoplasms by genomic copy-number profile and mucin phenotype
Source: Springer Nature journal article supplement (doi:10.1186/s12920-015-0080-6), 2015-02-17
Supplement: MOESM1 [file 12920_2015_80_MOESM1_ESM.pdf]

## Additional files

**Table S1 - Primer sequences used in quantitative PCR**

| Primer              | Sequence                  |
|---------------------|---------------------------|
| chr15* Forward      | AGTTTCGTTCTATACTTCACCTTGG |
| chr15* Reverse      | TCATCATTATTATTTTCCCATGACC |
| chr10** Forward     | TATGCATGGGTGATGTGCTT      |
| chr10** Reverse     | CAGAGGGAACCCTACATTCG      |
| <i>MYC</i> Forward  | ATCCTTTTAAGAAGTTGGCATTG   |
| <i>MYC</i> Reverse  | CACGTCCTAACACCTCTAGAGACC  |
| <i>TP53</i> Forward | CTGAGGAGTGCCGAAGAGAAT     |
| <i>TP53</i> Reverse | ACTGCAAAGCTTCTGGAAGAAC    |
| <i>MME</i> Forward  | GGACTTAACCCTGTGTCTTTGG    |
| <i>MME</i> Reverse  | CCTGAAATACGGAGTTCTGGAC    |

\*chr15:51481794-51481853

\*\*chr10:72681585-72681644

**Table S2a - Clinicopathological features of groups A, B, and C**

| No | Case              | Age | Sex | Size | Macroscopic | Vienna         | Resection |
|----|-------------------|-----|-----|------|-------------|----------------|-----------|
|    | No                |     |     | (mm) | type*       | classification | method    |
| 1  | A1                | 81  | M   | 2    | 0-IIb       | 3              | ESD       |
| 2  | A2 <sup>(5)</sup> | 78  | M   | 4    | 0-I         | 3              | OP        |
| 3  | A3 <sup>(1)</sup> | 59  | F   | 5    | 0-I         | 3              | ESD       |
| 4  | A4 <sup>(2)</sup> | 66  | M   | 5    | 0-IIa       | 3              | OP        |

| No | Case No            | Age | Sex | Size (mm) | Macroscopic type* | Vienna classification | Resection method |
|----|--------------------|-----|-----|-----------|-------------------|-----------------------|------------------|
| 5  | A5                 | 61  | M   | 6         | 0-I               | 3                     | ESD              |
| 6  | A6                 | 65  | F   | 6         | 0-IIa             | 3                     | ESD              |
| 7  | A7 <sup>(1)</sup>  | 59  | F   | 12        | 0-I               | 3                     | ESD              |
| 8  | B1                 | 41  | M   | 3         | 0-IIb             | 4                     | ESD              |
| 9  | B2                 | 67  | M   | 3         | 0-IIc             | 4                     | ESD              |
| 10 | B3                 | 67  | F   | 4         | 0-IIb             | 4                     | ESD              |
| 11 | B4                 | 60  | M   | 5         | 0-IIc             | 4                     | ESD              |
| 12 | B5 <sup>(3)</sup>  | 72  | F   | 6         | 0-IIa             | 4                     | OP               |
| 13 | B6                 | 52  | F   | 7         | 0-IIb             | 4                     | ESD              |
| 14 | B7                 | 61  | M   | 8         | 0-IIc             | 4                     | ESD              |
| 15 | B8                 | 59  | M   | 8         | 0-I               | 4                     | OP               |
| 16 | B9                 | 77  | F   | 9         | 0-I               | 4                     | ESD              |
| 17 | B10                | 61  | M   | 10        | 0-IIb             | 4                     | ESD              |
| 18 | B11 <sup>(2)</sup> | 66  | M   | 20        | 0-IIa             | 4                     | OP               |
| 19 | B12 <sup>(3)</sup> | 72  | F   | 30        | 0-IIc             | 4                     | OP               |

\*Histology type, macroscopic type, depth of invasion, pTNM staging is according to the Japanese gastric cancer classification [23]. OP: surgical resection; ESD: endoscopic submucosal dissection. Concurrent lesions are noted as superscript from (1) to (5) attached to case number.

**Table S2b - (cont.)**

| No | Sample              | Age | Sex | Size<br>(mm) | Histological<br>type* | Depth of<br>invasion* | pT | pN | p | ly | v | Stage |
|----|---------------------|-----|-----|--------------|-----------------------|-----------------------|----|----|---|----|---|-------|
|    |                     |     |     |              |                       |                       |    |    | M |    |   |       |
| 1  | Cm1                 | 73  | M   | 15           | tub                   | M                     | 1a | 0  | 0 |    |   | 1A    |
| 2  | Cm2                 | 76  | M   | 22           | pap>tub2              | M                     | 1a | 0  | 0 |    |   | 1A    |
| 3  | Cm3                 | 59  | M   | 25           | pap>tub               | M                     | 1a | 0  | 0 |    |   | 1A    |
| 4  | Cm4                 | 80  | F   | 25           | tub2>por              | M                     | 1a | 0  | 0 |    |   | 1A    |
| 5  | Cm5                 | 68  | M   | 25           | tub                   | M                     | 1a | 0  | 0 |    |   | 1A    |
| 6  | Cm6                 | 81  | M   | 30           | tub                   | M                     | 1a | 0  | 0 |    |   | 1A    |
| 7  | Cm7                 | 65  | M   | 35           | tub>pap               | M                     | 1a | 0  | 0 |    |   | 1A    |
| 8  | Cm8                 | 92  | F   | 40           | pap>tub               | M                     | 1a | 0  | 0 |    |   | 1A    |
| 9  | Cd1m <sup>(4)</sup> | 82  | M   | 15           | tub                   | MP                    | 2  | 1  | 0 |    |   | IIA   |
| 10 | Cd2m                | 64  | F   | 15           | tub2>pap              | SM1b                  | 1b | 1  | 0 | +  | + | IB    |
| 11 | Cd3m                | 75  | F   | 20           | tub2>por2             | SM1b                  | 1b | 1  | 0 | +  |   | IB    |
| 12 | Cd4m                | 70  | M   | 30           | tub                   | MP                    | 2  | 0  | 0 | +  |   | IB    |
| 13 | Cd5m                | 88  | F   | 35           | pap+tub               | MP                    | 2  | 0  | 0 |    |   | IB    |
| 14 | Cd6m <sup>(4)</sup> | 82  | M   | 40           | tub2                  | SS                    | 3  | 1  | 0 | +  | + | IIB   |
| 15 | Cd7m                | 72  | M   | 40           | tub2>pap              | SS                    | 3  | 0  | 0 | +  | + | IIA   |
| 16 | Cd8m                | 65  | M   | 40           | tub2>por2             | SS                    | 3  | 3b | 0 | +  | + | IIIB  |
| 17 | Cd9m                | 79  | M   | 45           | tub>por1              | SE                    | 4a | 2  | 0 | +  | + | IIIB  |
| 18 | Cd10m               | 83  | M   | 57           | tub >pap              | SM1b                  | 1b | 0  | 0 |    |   | IA    |

|    |                      |    |   |     |              |    |    |    |   |   |   |      |
|----|----------------------|----|---|-----|--------------|----|----|----|---|---|---|------|
| 19 | Cd11m                | 85 | M | 60  | tub>pap      | SS | 3  | 3a | 0 | + | + | IIIB |
| 20 | Cd12m <sup>(5)</sup> | 78 | M | 65  | tub2         | SS | 3  | 2  | 0 | + |   | IIIA |
| 21 | Cd13m                | 80 | M | 80  | tub>por2+pap | SS | 3  | 3a | 0 | + |   | IIIB |
| 22 | Cd14m                | 79 | F | 80  | tub2>por     | SS | 3  | 3b | 0 | + | + | IIIB |
| 23 | Cd15m                | 71 | M | 95  | tub          | SE | 4a | 3a | 0 | + | + | IIIC |
| 24 | Cd16m                | 86 | M | 100 | tub>pap      | SS | 3  | 1  | 0 | + |   | IIB  |

**Table S3 - Mucin phenotypic expressions in groups A, B, and C**

| No | Case No           | MUC5AC | MUC6 | MUC2 | CD10 | Phenotype |
|----|-------------------|--------|------|------|------|-----------|
| 1  | A1                | n      | n    | -    | 3+   | I         |
| 2  | A2 <sup>(5)</sup> | n      | n    | 1+   | 2+   | I         |
| 3  | A3 <sup>(1)</sup> | n      | n    | 1+   | 3+   | I         |
| 4  | A4 <sup>(2)</sup> | n      | n    | 3+   | 2+   | I         |
| 5  | A5                | n      | -    | -    | 3+   | I         |
| 6  | A6                | n      | n    | 1+   | 1+   | I         |
| 7  | A7 <sup>(1)</sup> | n      | n    | 3+   | 3+   | I         |
| 8  | B1                | -      | -    | 1+   | 2+   | I         |
| 9  | B2                | 1+     | -    | -    | 3+   | G<I       |
| 10 | B3                | -      | 1+   | 1+   | 1+   | G<I       |
| 11 | B4                | 3+     | 2+   | -    | n    | G         |
| 12 | B5 <sup>(3)</sup> | -      | 1+   | 2+   | 3+   | G<I       |
| 13 | B6                | 1+     | 1+   | -    | 2+   | G=I       |
| 14 | B7                | n      | -    | 1+   | 3+   | I         |
| 15 | B8                | -      | 1+   | 1+   | 2+   | G<I       |

| No | Case No              | MUC5AC | MUC6 | MUC2 | CD10 | Phenotype |
|----|----------------------|--------|------|------|------|-----------|
| 16 | B9                   | -      | -    | 2+   | 2+   | I         |
| 17 | B10                  | 1+     | -    | 1+   | -    | G=I       |
| 18 | B11 <sup>(2)</sup>   | -      | -    | 1+   | 3+   | I         |
| 19 | B12 <sup>(3)</sup>   | -      | 1+   | 1+   | 3+   | G<I       |
| 20 | Cm1                  | 2+     | 3+   | -    | -    | G         |
| 21 | Cm2                  | 1+     | 1+   | 1+   | -    | G>I       |
| 22 | Cm3                  | 2+     | 2+   | 1+   | 2+   | G>I       |
| 23 | Cm4                  | 3+     | 1+   | -    | -    | G         |
| 24 | Cm5                  | -      | -    | 1+   | 3+   | I         |
| 25 | Cm6                  | -      | -    | 1+   | 2+   | I         |
| 26 | Cm7                  | 3+     | 2+   | -    | -    | G         |
| 27 | Cm8                  | 3+     | 1+   | -    | -    | G         |
| 28 | Cd1m <sup>(4)</sup>  | 1+     | 1+   | -    | -    | G         |
| 29 | Cd2m                 | 2+     | 1+   | 1+   | -    | G>I       |
| 30 | Cd3m                 | -      | -    | 1+   | -    | I         |
| 31 | Cd4m                 | 1+     | -    | n    | -    | G         |
| 32 | Cd5m                 | -      | -    | n    | 1+   | I         |
| 33 | Cd6m <sup>(4)</sup>  | -      | -    | -    | -    | N         |
| 34 | Cd7m                 | -      | n    | n    | 3+   | I         |
| 35 | Cd8m                 | n      | -    | 1+   | n    | I         |
| 36 | Cd9m                 | -      | 1+   | -    | 3+   | G<I       |
| 37 | Cd10m                | -      | -    | -    | -    | N         |
| 38 | Cd11m                | -      | -    | 1+   | -    | I         |
| 39 | Cd12m <sup>(5)</sup> | -      | -    | 1+   | 3+   | I         |

| No | Case No | MUC5AC | MUC6 | MUC2 | CD10 | Phenotype |
|----|---------|--------|------|------|------|-----------|
| 40 | Cd13m   | 1+     | 1+   | n    | n    | G         |
| 41 | Cd14m   | 3+     | 3+   | n    | n    | G         |
| 42 | Cd15m   | -      | 1+   | 2+   | 1+   | G<I       |
| 43 | Cd16m   | 3+     | 2+   | n    | -    | G         |

**Table S4 - Constitution of phenotypic expression in groups (A, B, and C) and clusters (*stable, intermediate, and unstable*)**

|                                             |                  | Phenotypic expression |    |    |   |
|---------------------------------------------|------------------|-----------------------|----|----|---|
|                                             |                  | G                     | GI | I  | N |
| Group                                       | A                | 0                     | 0  | 7  | 0 |
|                                             | B                | 1                     | 7  | 4  | 0 |
|                                             | Cm               | 4                     | 2  | 2  | 0 |
|                                             | Cd               | 5                     | 3  | 6  | 2 |
| Comparison<br>(Cochran Armitage trend test) | A vs B           | 0.005*                |    |    |   |
|                                             | A vs C           | 0.030*                |    |    |   |
|                                             | Cm vs Cd         | 0.211                 |    |    |   |
|                                             | B vs Cm          | 0.149                 |    |    |   |
|                                             | B vs Cd          | 0.842                 |    |    |   |
|                                             | A/B vs C         | 0.147                 |    |    |   |
| Cluster                                     | Stable (S)       | 1                     | 4  | 6  | 0 |
|                                             | Intermediate (I) | 0                     | 1  | 3  | 0 |
|                                             | Unstable (U)     | 9                     | 7  | 10 | 2 |

|                               |        |       |
|-------------------------------|--------|-------|
| Comparison                    | S vs I | 0.375 |
| (Cochran Armitage trend test) | I vs U | 0.233 |
|                               | S vs U | 0.298 |

\*Significant differences are considered as bilateral  $p$  value  $\leq 0.05$

**Table S5 - List of 51 genes extracted by  $t$  test with Bonferroni correction from 5 different comparisons**

| No | Gene symbol      | Gene name                                                          | HUGO gene nonmenclature ID | Location          | Identified probe | Comparison                                     | $t$ test                                  |                                           |
|----|------------------|--------------------------------------------------------------------|----------------------------|-------------------|------------------|------------------------------------------------|-------------------------------------------|-------------------------------------------|
|    |                  |                                                                    |                            |                   |                  |                                                | $p$ value                                 | $p$ value after Bonferroni correction     |
| 1  | <i>FHL3</i>      | four and a half LIM domains 3                                      | HGNC:3704                  | 1p34.3            | 1                | 11 S vs 32 IU<br>11 S vs 28U                   | 9.82838E-07<br>2.45323E-06                | 0.014499814<br>0.036192457                |
| 2  | <i>DSTYK</i>     | dual serine/threonine and tyrosine protein kinase                  | HGNC:29043                 | 1q32              | 1                | 11 S vs 32 IU                                  | 1.35217E-06                               | 0.019948632                               |
| 3  | <i>SLC32A1</i>   | solute carrier family 32 (GABA vesicular transporter), member 1    | HGNC:11018                 | 20q11             | 1                | 11 S vs 32 IU<br>11 S vs 28 U                  | 4.47098E-08<br>2.06923E-07                | 0.000659604<br>0.003052734                |
| 4  | <i>DIO2</i>      | deiodinase, iodothyronine, type II                                 | HGNC:2884                  | 14q24.2-q24.3     | 4                | 11 S vs 32 IU<br>11 S vs 28 U                  | 2.05526E-07<br>8.07541E-08                | 0.003032126<br>0.001191365                |
| 5  | <i>SHROOM1</i>   | shroom family member 1                                             | HGNC:24084                 | 5q31.1            | 1                | 11 S vs 32 IU<br>11 S vs 28 U                  | 1.09434E-08<br>1.0981E-07                 | 0.000161448<br>0.001620029                |
| 6  | <i>COL11A2</i>   | collagen, type XI, alpha 2                                         | HGNC:2187                  | 6p21.3            | 3                | 11 S vs 32 IU                                  | 6.27525E-07                               | 0.009257877                               |
| 7  | <i>RAB11A</i>    | RAB11A, member RAS oncogene family                                 | HGNC:9760                  | 15q22.31          | 1                | 11 S vs 32 U<br>15 SI vs 28 U<br>11 S vs 28 U  | 1.16426E-06<br>2.70238E-06<br>1.10129E-06 | 0.017176308<br>0.039868251<br>0.01624736  |
| 8  | <i>CAPNS1</i>    | calpain, small subunit 1                                           | HGNC:1481                  | 19q13.1           | 1                | 15 SI vs 28 U                                  | 1.42563E-06                               | 0.021032346                               |
| 9  | <i>F12</i>       | coagulation factor XII (Hageman factor)                            | HGNC:3530                  | 5q35.3            | 1                | 15 SI vs 28 U<br>11 S vs 28 U                  | 3.263E-07<br>1.0769E-06                   | 0.0048139<br>0.015887463                  |
| 10 | <i>TKTL2</i>     | transketolase-like 2                                               | HGNC:25313                 | 4q32.2            | 1                | 11 S vs 32 IU                                  | 2.31316E-06                               | 0.03412603                                |
| 11 | <i>SOX3</i>      | SRY (sex determining region Y)-box 3                               | HGNC:11199                 | Xq27.1            | 2                | 15 SI vs 28 U<br>11 S vs 28 U                  | 2.69489E-07<br>6.50137E-07                | 0.003975777<br>0.009591465                |
| 12 | <i>CCDC94</i>    | coiled-coil domain containing 94                                   | HGNC:25518                 | 19p13.3           | 2                | 11 S vs 32 IU<br>11 S vs 28 U                  | 8.54309E-07<br>1.06791E-06                | 0.012603618<br>0.015754844                |
| 13 | <i>IRF2BP1</i>   | interferon regulatory factor 2 binding protein 1                   | HGNC:21728                 | 19q13.32          | 2                | 11 S vs 32 IU                                  | 2.93674E-06                               | 0.043325674                               |
| 14 | <i>HIST1H2AI</i> | histone cluster 1, H2ai                                            | HGNC:4725                  | 6p22.1            | 1                | 11 S vs 32 IU<br>11 S vs 28 U                  | 3.50554E-07<br>2.66901E-07                | 0.005171728<br>0.003937586                |
| 15 | <i>KIAA1143</i>  | <i>KIAA1143</i>                                                    | HGNC:29198                 | 3p21.31           | 2                | 11 S vs 32 IU<br>15 SI vs 28 U<br>11 S vs 28 U | 3.21833E-06<br>8.24555E-08<br>1.26514E-07 | 0.047480032<br>0.001216466<br>0.001866466 |
| 16 | <i>PCBP3</i>     | poly(rC) binding protein 3                                         | HGNC:8651                  | 21q22.3           | 2                | 11 S vs 32 IU<br>11 S vs 28 U                  | 1.90924E-08<br>7.81468E-09                | 0.00028167<br>0.00011529                  |
| 17 | <i>THBS2</i>     | thrombospondin 2                                                   | HGNC:11786                 | 6q27              | 1                | 11 S vs 32 IU<br>11 S vs 28 U                  | 2.46703E-07<br>6.93897E-07                | 0.003639611<br>0.010237066                |
| 18 | <i>MLC1</i>      | megalencephalic leukoencephalopathy with subcortical cysts 1       | HGNC:17082                 | 22q13.33          | 1                | 11 S vs 28 U                                   | 3.25292E-06                               | 0.047990312                               |
| 19 | <i>PPP2R3B</i>   | protein phosphatase 2, regulatory subunit B", beta                 | HGNC:13417                 | Xp22.3 and Yp11.3 | 3                | 11 S vs 28 U                                   | 3.33289E-06                               | 0.04917013                                |
| 20 | <i>IRS1</i>      | insulin receptor substrate 1                                       | HGNC:6125                  | 2q36              | 2                | 11 S vs 32 IU<br>15 SI vs 28 U<br>11 S vs 28 U | 3.09264E-06<br>3.17104E-07<br>9.09683E-07 | 0.045625778<br>0.004678235<br>0.01342055  |
| 21 | <i>RXRβ</i>      | retinoid X receptor, beta                                          | HGNC:10478                 | 6p21.3            | 1                | 11 S vs 32 IU<br>15 SI vs 28 U<br>11 S vs 28 U | 5.02328E-09<br>1.60973E-06<br>2.57181E-09 | 7.41085E-05<br>0.023748377<br>3.79418E-05 |
| 22 | <i>PTPN18</i>    | protein tyrosine phosphatase, non-receptor type 18 (brain-derived) | HGNC:9649                  | 2q21              | 2                | 11 S vs 4 I                                    | 1.09025E-08                               | 0.000160844                               |
| 23 | <i>BB55</i>      | Bardet-Biedl syndrome 5                                            | HGNC:970                   | 2q31              | 2                | 4 I vs 28 U                                    | 2.46458E-07                               | 0.00363599                                |
| 24 | <i>SAMD9</i>     | sterile alpha motif domain containing 9                            | HGNC:1348                  | 7q21.2            | 1                | 11 S vs 4 I                                    | 1.5483E-06                                | 0.022842109                               |

| No | Gene symbol    | Gene name                                                                                                                                   | HUGO gene nonmenclature ID | Location      | Identified probe | Comparison                                     | t test                                  |                                           |
|----|----------------|---------------------------------------------------------------------------------------------------------------------------------------------|----------------------------|---------------|------------------|------------------------------------------------|-----------------------------------------|-------------------------------------------|
|    |                |                                                                                                                                             |                            |               |                  |                                                | p value                                 | p value after Bonferroni correction       |
| 25 | <i>UEVLD</i>   | UEV and lactate/malate dehydrogenase domains                                                                                                | HGNC:30866                 | 11p15.1       | 4                | 4 I vs 28 U                                    | 1.05191E-07                             | 0.001551882                               |
| 26 | <i>KCNE1</i>   | potassium channel, voltage-gated, Isk-related subfamily, member 1                                                                           | HGNC:6240                  | 21q22.1-q22.2 | 2                | 4 I vs 28 U                                    | 1.31155E-06                             | 0.019349264                               |
| 27 | <i>HMGNI</i>   | high mobility group nucleosome binding domain 1                                                                                             | HGNC:4984                  | 21q22.3       | 1                | 4 I vs 28 U                                    | 2.92559E-08                             | 0.000431613                               |
| 28 | <i>TMEM30A</i> | transmembrane protein 30A                                                                                                                   | HGNC:16667                 | 6q14.1        | 2                | 4 I vs 28 U                                    | 3.44255E-08                             | 0.000507879                               |
| 29 | <i>VPS8</i>    | vacuolar protein sorting 8 homolog (S. cerevisiae)                                                                                          | HGNC:29122                 | 3q27.2        | 5                | 11 S vs 4 I                                    | 1.78442E-06                             | 0.026325478                               |
| 30 | <i>SAAL1</i>   | serum amyloid A-like 1                                                                                                                      | HGNC:25158                 | 11p15.1       | 1                | 11 S vs 4 I                                    | 3.33267E-07                             | 0.00491669                                |
| 31 | <i>EEF1A1</i>  | eukaryotic translation elongation factor 1 alpha 1                                                                                          | HGNC:3189                  | 6q14.1        | 1                | 11 S vs 4 I                                    | 8.37703E-07                             | 0.012358636                               |
| 32 | <i>SEMA5B</i>  | sema domain, seven thrombospondin repeats (type 1 and type 1-like), transmembrane domain (TM) and short cytoplasmic domain, (semaphorin) 5B | HGNC:10737                 | 3q21.1        | 2                | 11 S vs 32 IU<br>11 S vs 28 U                  | 4.43282E-07<br>2.28392E-06              | 0.006539733<br>0.033694689                |
| 33 | <i>TGS1</i>    | trimethylguanosine synthase 1                                                                                                               | HGNC:17843                 | 8q11          | 2                | 11 S vs 32 IU                                  | 1.71005E-06                             | 0.025228379                               |
| 34 | <i>MTFR1</i>   | mitochondrial fission regulator 1                                                                                                           | HGNC:29510                 | 8q13.1        | 3                | 11 S vs 32 IU<br>11 S vs 28 U                  | 6.32177E-07<br>8.79864E-07              | 0.009326501<br>0.012980631                |
| 35 | <i>VPS13B</i>  | vacuolar protein sorting 13 homolog B (yeast)                                                                                               | HGNC:2183                  | 8q22-q23      | 18               | 11 S vs 32 IU<br>15 SI vs 28 U<br>11 S vs 28 U | 1.29566E-07<br>6.516E-09<br>1.67141E-08 | 0.001911493<br>9.61305E-05<br>0.000246583 |
| 36 | <i>NCOA2</i>   | nuclear receptor coactivator 2                                                                                                              | HGNC:7669                  | 8q13.3        | 7                | 15 SI vs 28 U                                  | 2.82575E-06                             | 0.041688263                               |
| 37 | <i>WWP1</i>    | WW domain containing E3 ubiquitin protein ligase 1                                                                                          | HGNC:17004                 | 8q21.3        | 2                | 15 SI vs 28 U                                  | 5.84908E-07                             | 0.008629148                               |
| 38 | <i>NIPAL2</i>  | NIPA-like domain containing 2                                                                                                               | HGNC:25854                 | 8q22.2        | 5                | 15 SI vs 28 U                                  | 9.51024E-07                             | 0.014030464                               |
| 39 | <i>GRHL2</i>   | grainyhead-like 2 (Drosophila)                                                                                                              | HGNC:2799                  | 8q22.3        | 5                | 15 SI vs 28 U<br>11 S vs 28 U                  | 2.44677E-06<br>3.28526E-06              | 0.03609713<br>0.048467374                 |
| 40 | <i>BAI1</i>    | brain-specific angiogenesis inhibitor 1                                                                                                     | HGNC:943                   | 8q24.3        | 3                | 4 I vs 28 U                                    | 9.65658E-07                             | 0.014246358                               |
| 41 | <i>RPL21</i>   | ribosomal protein L21                                                                                                                       | HGNC:10313                 | 13q12.2       | 2                | 4 I vs 28 U                                    | 7.8571E-07                              | 0.011591579                               |
| 42 | <i>LDHA</i>    | lactate dehydrogenase A                                                                                                                     | HGNC:6535                  | 11p15.1       | 1                | 4 I vs 28 U                                    | 2.1244E-09                              | 3.13413E-05                               |
| 43 | <i>CA1</i>     | carbonic anhydrase I                                                                                                                        | HGNC:1368                  | 8q21.2        | 2                | 4 I vs 28 U                                    | 5.18977E-07                             | 0.007656464                               |
| 44 | <i>F13A1</i>   | coagulation factor XIII, A1 polypeptide                                                                                                     | HGNC:3531                  | 6p24.2-p23    | 3                | 15 SI vs 28 U                                  | 3.00863E-06                             | 0.044386261                               |
| 45 | <i>JPH1</i>    | junctophilin 1                                                                                                                              | HGNC:14201                 | 8q21          | 4                | 11 S vs 28 U                                   | 1.02881E-06                             | 0.015178074                               |
| 46 | <i>UBE2W</i>   | ubiquitin-conjugating enzyme E2W (putative)                                                                                                 | HGNC:25616                 | 8q21.11       | 2                | 4 I vs 28 U                                    | 6.83879E-09                             | 0.000100893                               |
| 47 | <i>SLC27A3</i> | solute carrier family 27 (fatty acid transporter), member 3                                                                                 | HGNC:10997                 | 1q21.1        | 1                | 4 I vs 28 U                                    | 2.67077E-06                             | 0.039401925                               |
| 48 | <i>GDF5</i>    | growth differentiation factor 5                                                                                                             | HGNC:4220                  | 20q11.2       | 1                | 4 I vs 28 U                                    | 3.75915E-07                             | 0.005545881                               |
| 49 | <i>CDC40</i>   | cell division cycle 40                                                                                                                      | HGNC:17350                 | 6q22.1        | 1                | 4 I vs 28 U                                    | 2.40453E-07                             | 0.003547409                               |
| 50 | <i>CNN1</i>    | calponin 1, basic, smooth muscle                                                                                                            | HGNC:2155                  | 19p13.2-p13.1 | 1                | 11 S vs 4 I                                    | 2.69634E-06                             | 0.039779062                               |
| 51 | <i>PTGER1</i>  | prostaglandin E receptor 1 (subtype EP1), 42kDa                                                                                             | HGNC:9593                  | 19p13.1       | 1                | 11 S vs 4 I                                    | 2.29431E-06                             | 0.03384792                                |

In the column of “Comparison”, 11 S, 28 U, 4 I, 15 SI, and 32 IU indicate 11 samples of the stable cluster, 28 samples of the unstable cluster, 4 samples of the intermediate cluster, 15 samples of combined stable and intermediate clusters, and 32 samples of combined intermediate and unstable clusters, respectively.
