# Supplementary material for: Progression risk assessments of individual non-invasive gastric neoplasms by genomic copy-number profile and mucin phenotype
Source: Springer Nature journal article supplement (doi:10.1186/s12920-015-0080-6), 2015-02-17

2-probe genes

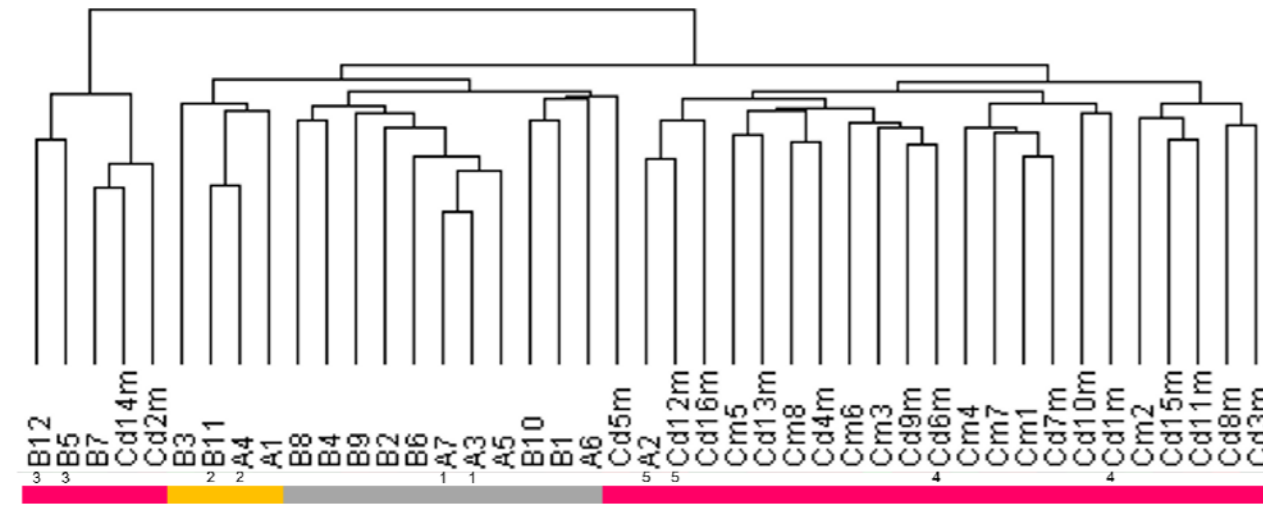

3-probe genes

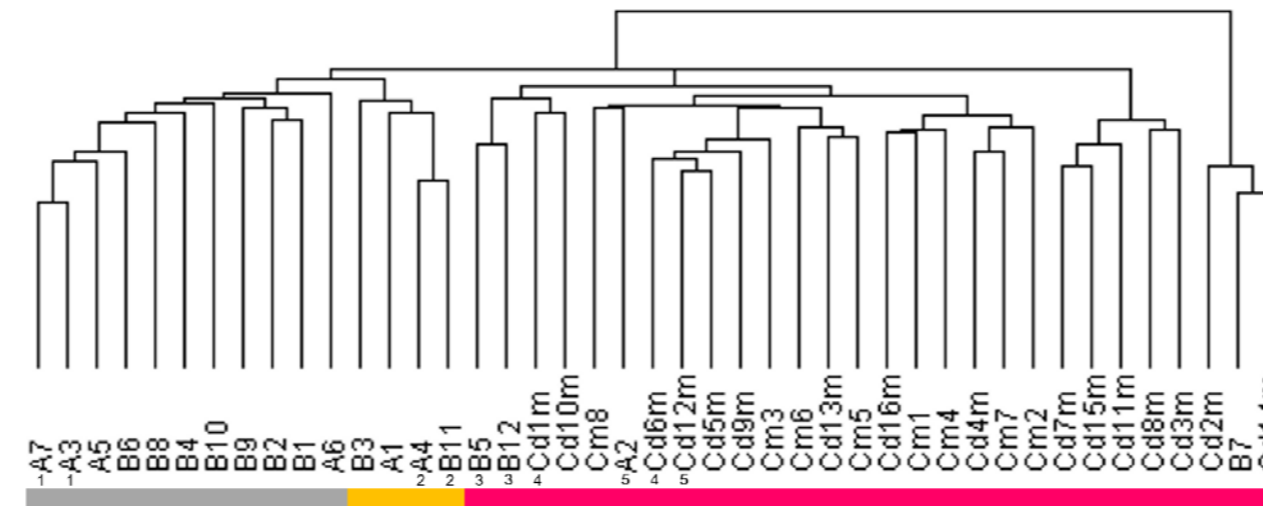

4-probe genes

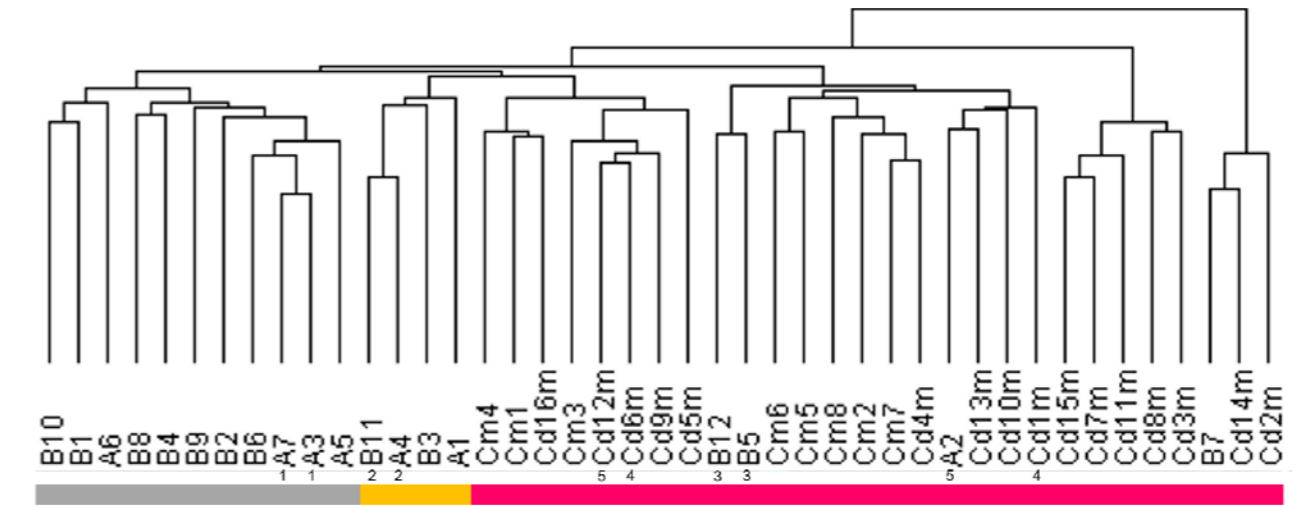

5-probe genes

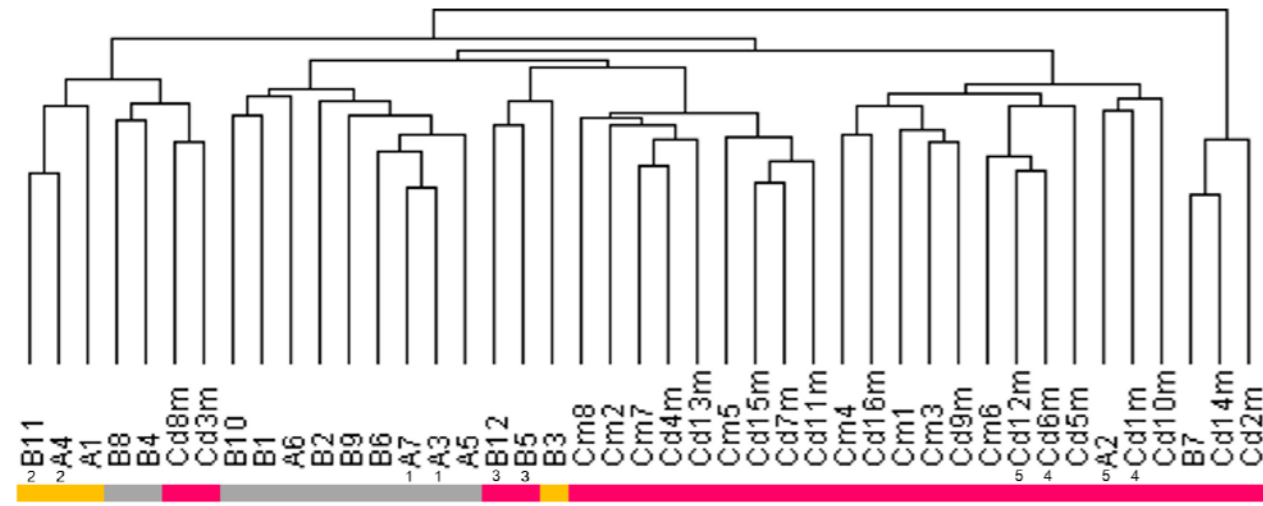

6-probe genes

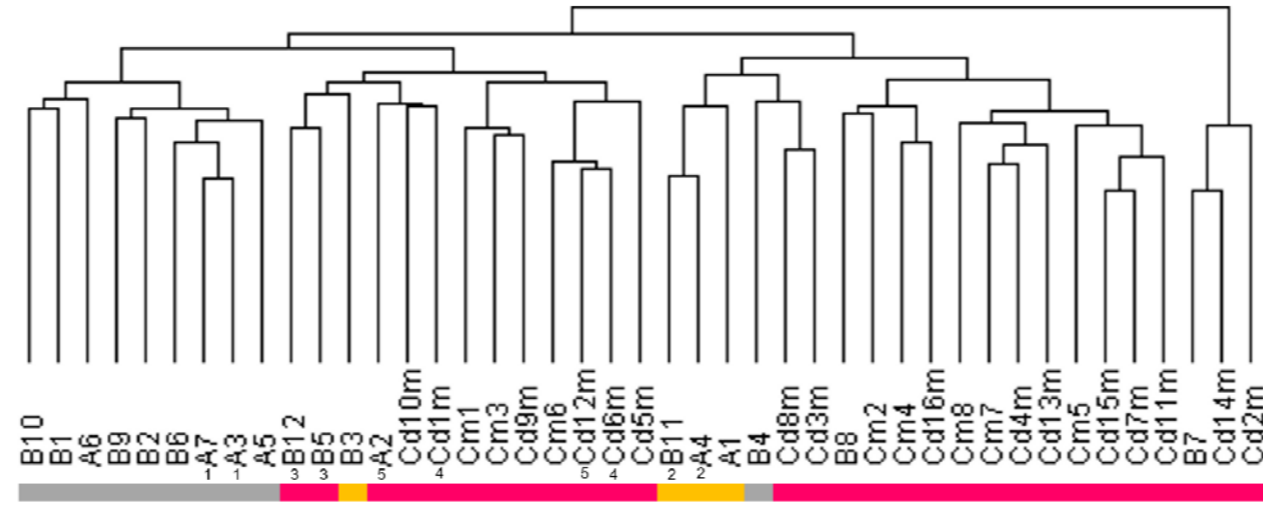

7-probe genes

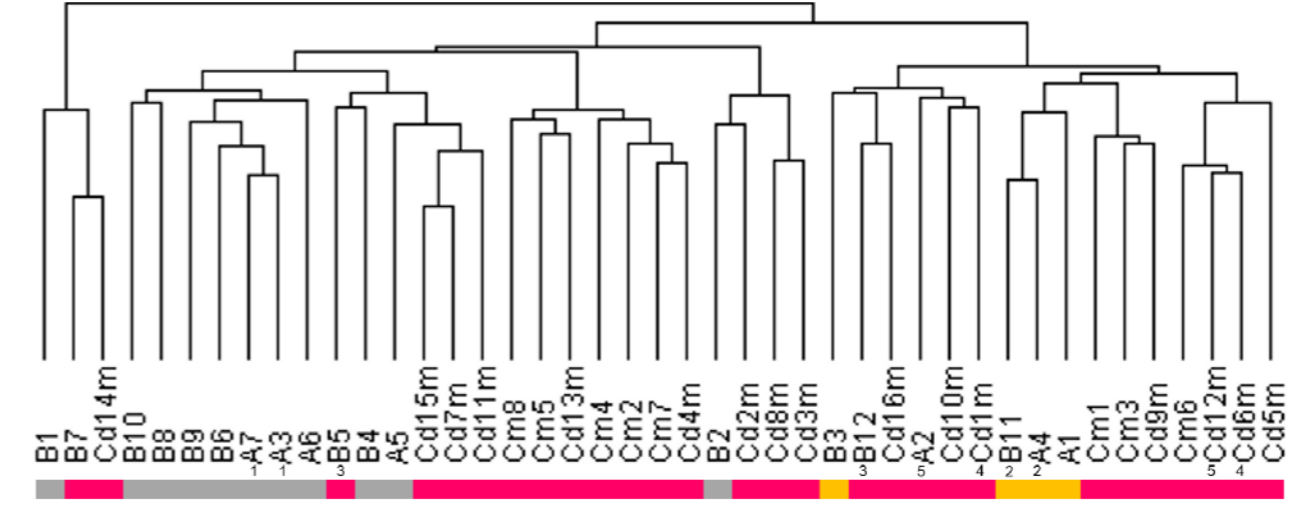

8-probe genes

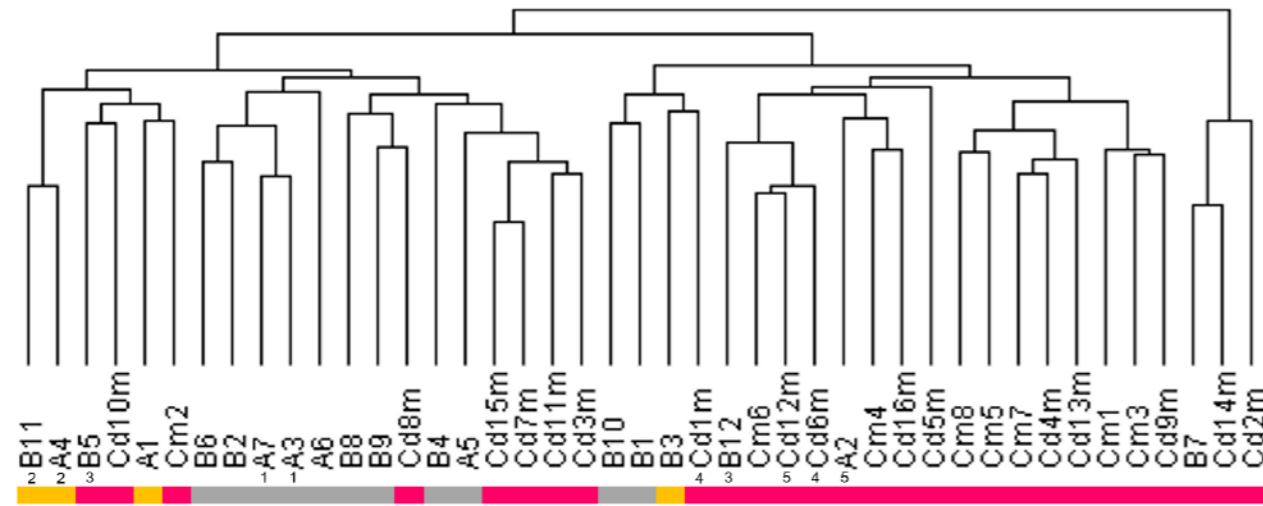

9-probe genes

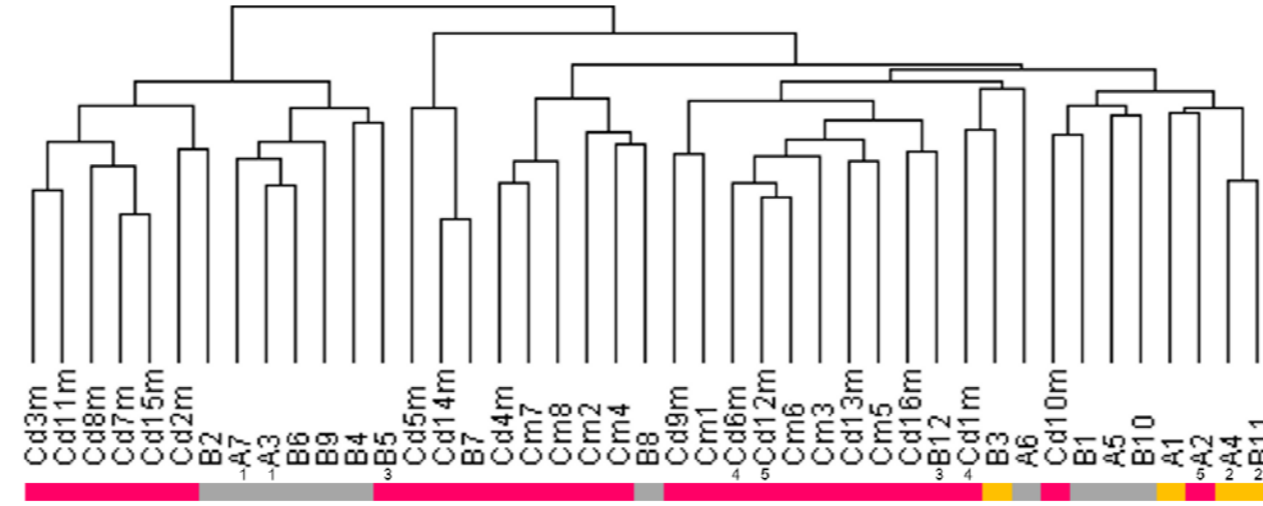

10-probe genes

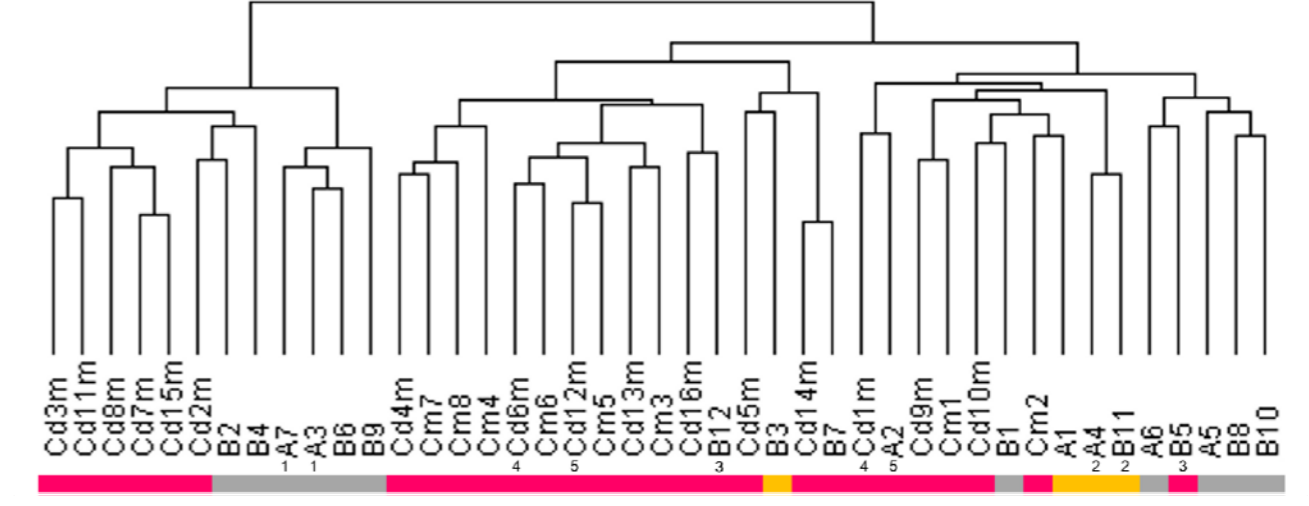

Supplement: MOESM4 [file 12920_2015_80_MOESM4_ESM.pdf]
