# Supplementary material for: Progression risk assessments of individual non-invasive gastric neoplasms by genomic copy-number profile and mucin phenotype
Source: Springer Nature journal article supplement (doi:10.1186/s12920-015-0080-6), 2015-02-17
Supplement: MOESM5 [file 12920_2015_80_MOESM5_ESM.pdf]

| No | Gene symbol      | Location          | Association of chromosomal CNAs with gene CNAs | Stable |       |       |       |       |       |       |       |       |       | Intermediate |       |       |       |       | Unstable |       |       |       |       |       |       |       |       |       |       |       |       |       |       |       |       |       |       |       |       |       |       |       |       |       |       |       |       |
|----|------------------|-------------------|------------------------------------------------|--------|-------|-------|-------|-------|-------|-------|-------|-------|-------|--------------|-------|-------|-------|-------|----------|-------|-------|-------|-------|-------|-------|-------|-------|-------|-------|-------|-------|-------|-------|-------|-------|-------|-------|-------|-------|-------|-------|-------|-------|-------|-------|-------|-------|
|    |                  |                   |                                                | A7     | A3    | A5    | B6    | B8    | B4    | B10   | B9    | B2    | B1    | A6           | B3    | A1    | A4    | B11   | B5       | B12   | Cd1m  | Cd10r | Cm8   | A2    | Cd6m  | Cd12r | Cd5m  | Cd9m  | Cm3   | Cm6   | Cd13r | Cm5   | Cd16r | Cm1   | Cm4   | Cd4m  | Cm7   | Cm2   | Cd7m  | Cd15r | Cd11r | Cd8m  | Cd3m  | Cd2m  | B7    | Cd14m |       |
| 1  | <i>FHL3</i>      | 1p34.3            |                                                | 0.111  | 0.463 | 0.056 | 0.22  | 0.64  | 0.017 | -0.09 | -0.24 | 0.286 | 0.1   | -0.05        | -1.38 | -1.02 | 0.405 | -0.89 | -0.89    | -0.93 | -1.3  | -0.63 | -1.28 | -1.12 | -0.07 | -0.8  | -0.13 | 0.116 | -0.44 | -0.27 | -1.6  | -0.4  | -1.49 | -0.19 | 0.469 | -1.11 | -0.31 | -0.35 | -1.11 | -0.61 | -0.01 | -0.66 | -0.35 | 0.069 | -0.07 | -0.44 |       |
| 2  | <i>DSTYK</i>     | 1q32              |                                                | 0.145  | -0    | 0.104 | -0.17 | -0.35 | 0.052 | 0.181 | 0.667 | 0.187 | 0.066 | -0.47        | -0.05 | -0.83 | -0.49 | -1.87 | -0.4     | -0.24 | -1.9  | -2.48 | -0.55 | -3.4  | -1.61 | -3.57 | -2.84 | -1.52 | -1.19 | -0.96 | -4.33 | -0.56 | -1.23 | -1.29 | -0.72 | -0.92 | -0.91 | -0.96 | -0.51 | -1.4  | 0.078 | 0.431 | 0.749 | -1.83 | -0.18 | -2.09 |       |
| 3  | <i>SLC32A1</i>   | 20q11             |                                                | -0.11  | 0.097 | 0.111 | -0.03 | -0.13 | -0.09 | 0.181 | 0.317 | 0.081 | 0.252 | -0.12        | -0.24 | -0.64 | -0.14 | -0.64 | -0.03    | -0.35 | -0.56 | -0.3  | -1.01 | -1.85 | -0.54 | -1.5  | -0.03 | -0.86 | 0.323 | -0.05 | -1.07 | -0.02 | -0.77 | -0.65 | -0.44 | -0.24 | -0.28 | -0.69 | -0.68 | -0.04 | -0.83 | -1.04 | -1.18 | -0.81 | -0.42 | -0.57 |       |
| 4  | <i>D102</i>      | 14q24.2-q24.3     |                                                | 0.394  | 0.202 | 0.29  | 0.16  | 0.13  | -0.05 | 0.165 | 0.266 | 0.131 | 0.07  | 0.117        | 0.464 | 0.039 | -0.42 | -0.35 | -0.35    | -0.45 | -0.16 | -0.39 | -1.06 | -0.29 | -1.91 | -0.53 | -0.45 | -0.59 | -0.18 | -0.32 | -1.12 | -0.04 | -0.05 | -0.33 | -0.3  | -0.16 | -0.47 | -0.18 | -0.32 | 0.146 | -0.17 | 0.102 | -0.12 | -0.19 | 0.441 | -0.28 |       |
| 5  | <i>SHROOM1</i>   | 5q31.1            | U                                              | 0.251  | 0.393 | 0.159 | 0.218 | 0.172 | -0.12 | 0.399 | 0.388 | 0.274 | 0.375 | 0.127        | -0.06 | -0.68 | -0.15 | -0.78 | -0.58    | -0.44 | -0.55 | -0.26 | -0.5  | -0.99 | 0.315 | -0.25 | -1.14 | -0.64 | 0.361 | -2.05 | -0.13 | -0.89 | -0.54 | -0.38 | 0.031 | 0.122 | -0.25 | -0.54 | -1.03 | 0.221 | -0.21 | -0.38 | -0.76 | -0.46 | -0.14 | -0.7  |       |
| 6  | <i>COL11A2</i>   | 6p21.3            |                                                | 0.383  | 0.32  | 0.21  | 0.207 | 0.137 | 0.217 | 0.314 | 0.27  | 0.191 | 0.217 | -0.02        | -0.41 | -0.13 | -0.34 | -0.2  | 0.053    | -0.48 | 0.032 | -0.25 | 0.154 | -0.47 | -0.42 | -0    | -0.25 | -0.28 | 0.141 | -0.46 | -0.29 | -0.23 | -0.61 | 0.298 | 0.08  | 0.377 | -0.17 | 0.119 | -0.29 | 0.188 | 0.2   | -0.03 | 0.076 | 0.21  | 0.049 | -0.17 |       |
| 7  | <i>RAB11A</i>    | 15q22.31          |                                                | 0.523  | 0.379 | 0.438 | 0.451 | 0.364 | 0.417 | 0.303 | 0.542 | 0.283 | 0.193 | 0.262        | 0.151 | 0.438 | 0.264 | 0.089 | 0.057    | -0.25 | -1.07 | -1.17 | 0.078 | -0.47 | -0.19 | 0.018 | 0.802 | -0.22 | -2.34 | -0.73 | -1.16 | -0.24 | -0.46 | -0.03 | 0.337 | -0.03 | -0.65 | -0.07 | 0.275 | -0.59 | -0.96 | -0.17 | -0.34 | -0.48 | 0.058 | 0.247 |       |
| 8  | <i>GAPNS1</i>    | 19q13.1           |                                                | 0.489  | 0.605 | 0.371 | 0.583 | 0.276 | 0.489 | -0.03 | 0.851 | 0.458 | 0.151 | 0.366        | 0.88  | 0.572 | 0.959 | 0.474 | -1.02    | -1.69 | 0.071 | -0.68 | 0.086 | -0.56 | 0.505 | 0.091 | 0.295 | -1.35 | -1.91 | -1.55 | -2.96 | -1.36 | 0.481 | 0.131 | 0.642 | 0.149 | 0.095 | -1.2  | 0.002 | 0.017 | -0.96 | -0.01 | 0.025 | -0.74 | -1.29 | -0.46 |       |
| 9  | <i>F12</i>       | 5q35.3            | U                                              | 0.644  | 0.153 | 0.143 | 0.814 | 0.263 | 0.106 | 0.921 | 0.414 | -0.06 | 0.681 | 0.602        | 0.098 | 0.933 | 0.87  | 0.331 | -0.9     | -1.5  | -1.63 | -0.4  | -0.13 | -2.41 | -0.57 | 0.71  | -0.12 | -2.22 | -2.28 | -1.16 | -1.69 | 0.253 | -0.56 | 0.059 | -1.99 | 0.061 | -0.69 | 0.044 | -0.46 | -0.37 | 0.009 | -1.03 | 0.822 | -0.14 | -1.22 | -0.33 |       |
| 10 | <i>TKTL2</i>     | 4q32.2            |                                                | 0.437  | 0.441 | 0.203 | 0.29  | 0.293 | 0.142 | 0.319 | 0.847 | 0.557 | 0.348 | 0.088        | -0.25 | 0.07  | -0.05 | -0.1  | -0.33    | 0.246 | -0.24 | -0.94 | -0.24 | -0.68 | 0.666 | -0.88 | 0.152 | 0.008 | -1.32 | -0.18 | -0.86 | -0.34 | -0.47 | 0.23  | 0.187 | -0.2  | -0.43 | -0.45 | -0.8  | -0.02 | 0.075 | -1.36 | 0.015 | 0.543 | 0.2   | 0.223 |       |
| 11 | <i>SOX3</i>      | Xq27.1            |                                                | 0.122  | 0.067 | 0.317 | 0.088 | 0.006 | 0.257 | 0.103 | 0.588 | 0.213 | 0.094 | 0.257        | 0.586 | -0.11 | 0.273 | 0.443 | 0.227    | -0.82 | -0.53 | -0.54 | -0.74 | -1.15 | -0.46 | -1.16 | -0.23 | 0.494 | -0.75 | -1.1  | -1.1  | -0.8  | 0.309 | -0.36 | -0.07 | -0.67 | 0.012 | 0.105 | -0.96 | -0.48 | -0.14 | -0.8  | -1.1  | -0.17 | -0.5  | -0.6  | 0.419 |
| 12 | <i>CCDC94</i>    | 19p13.3           |                                                | 0.248  | 0.409 | 0.562 | 0.852 | 0.094 | 0.433 | 0.676 | 0.741 | 0.608 | 0.764 | 0.21         | 0.49  | -0.52 | 0.193 | 0.081 | 0.7      | -0.73 | -1.05 | -0.31 | -0.33 | 0.073 | 0.149 | 0.131 | 0.357 | -0.05 | -0.1  | -0.89 | -0.83 | 0.617 | -0.84 | 0.021 | 0.672 | -1.35 | -0.08 | -0.18 | -1.66 | 0.167 | -0.14 | -0.06 | -0.49 | -0.45 | -0.21 | -0.62 |       |
| 13 | <i>IRF2BP1</i>   | 19q13.32          |                                                | 0.293  | 0.243 | 0.299 | 0.273 | 0.125 | 0.312 | -0.02 | 0.211 | 0.384 | 0.604 | 0.307        | -0.01 | 0.289 | 2E-04 | -0.68 | 0.146    | -0.5  | -0.23 | -0.36 | 0.109 | 0.144 | 0.893 | -0.03 | 0.143 | -0.26 | 0.081 | -0.22 | 0.056 | -0.64 | -0.27 | -0.62 | -0.62 | -0.74 | -0.11 | -0.18 | -1.08 | -0.46 | -0.12 | 0.571 | -0.51 | -0.56 | 0.093 | -1    |       |
| 14 | <i>HIST1H2AI</i> | 6p22.1            | S                                              | 0.238  | 0.503 | 0.507 | 0.405 | 0.539 | 0.838 | 0.218 | 1.254 | 0.541 | 0.248 | 0.725        | 0.568 | -0.45 | 0.102 | 0.132 | 0.417    | 0.02  | 0.851 | -0.73 | 0.046 | -0.86 | 0.217 | -0.37 | -0.16 | 0.059 | -1.46 | -1.31 | -1.24 | -1.39 | -0.53 | -0.58 | -1.51 | -1.15 | 0.761 | 0.299 | -0.34 | -0.65 | -0.11 | -0.13 | -1.04 | -0.79 | -0.2  | -0.22 |       |
| 15 | <i>K1A1143</i>   | 3p21.31           |                                                | 0.18   | 0.274 | 0.071 | 0.262 | -0.09 | -0.02 | 0.393 | 0.03  | -0.14 | -0.03 | -0           | 0.12  | -0.35 | 0.314 | 0.461 | -0.19    | 0.09  | -0.15 | -0.39 | -0.45 | -0.28 | -0.49 | -0    | -0.23 | -0.29 | -0.36 | -0.93 | -0.91 | -1.07 | -0.39 | -0.39 | -0.28 | -0.73 | -0.44 | -0.75 | -0.85 | -0.45 | -0.5  | -0.33 | -0.85 | -0.12 | -0.18 | -0.51 |       |
| 16 | <i>PCBP3</i>     | 21q22.3           | U                                              | 0.056  | -0.04 | 0.05  | 0.083 | 0.057 | 0.118 | -0.02 | 0.851 | 0.053 | -0.05 | 0.249        | 0.065 | 0.247 | -0.23 | -0.19 | -0.18    | -0.11 | -0.23 | -0.47 | -1.01 | -0.28 | -0.21 | -0.22 | -0.22 | -0.52 | -0.65 | -0.33 | -0.11 | -0.23 | -0.49 | -1.09 | -1.35 | -0.31 | -1.19 | -1.34 | -1.09 | -0.48 | -0.6  | 0.238 | -1.57 | -0.72 | -0.4  | -0.53 |       |
| 17 | <i>THBS2</i>     | 6q27              |                                                | -0.01  | 0.068 | 0.047 | 0.176 | -0.02 | -0.23 | 0.075 | -0.06 | -0.1  | 0.192 | 0.076        | 0.059 | -0.41 | -0.16 | -0.87 | 0.1      | -0.39 | -0.24 | -0.24 | -0.9  | -0.06 | -0.95 | 0.036 | -0.22 | -0.77 | -0.99 | -1.63 | -1.21 | -0.13 | -0.27 | -0.8  | -1.1  | -0.49 | -0.86 | -1.18 | -0.09 | -0.18 | -1.1  | 0.022 | -0.92 | -0.76 | 0.072 | -0.72 |       |
| 18 | <i>MLC1</i>      | 22q12.33          |                                                | 0.274  | 0.778 | -0.24 | 0.142 | 0.83  | 0.402 | -0.24 | 1.381 | 0.062 | 0.952 | 0.506        | 1.397 | 0.507 | 0.731 | -1.12 | -0.2     | -0.94 | -1.13 | -2.07 | -1.13 | -1.31 | -0.85 | 0.259 | 0.045 | -0.46 | -1.27 | -2.88 | -0.63 | -0.6  | 0.2   | -1.37 | -0.48 | -0.66 | -1.35 | -0.81 | -0.13 | -0.79 | -0.68 | -0.82 | -0.13 | -0.76 | -0.14 | -0.23 |       |
| 19 | <i>PPP2R3B</i>   | Xp22.3 and Yp11.3 |                                                | 0.174  | 0.163 | 0.171 | 0.3   | -0.26 | -0.1  | 0.3   | 0.491 | 0.261 | 0.136 | 0.153        | 0.23  | -0.3  | -0.17 | -0.31 | 0.058    | -0.17 | -0.91 | -1.48 | -0.98 | -0.74 | -0.84 | -0.29 | 0.026 | -0.67 | -1.29 | -1.29 | -0.81 | -0.58 | -0.16 | 0.375 | 0.105 | -0.28 | -0.65 | -0.24 | -0.42 | -0.53 | -0.59 | 0.48  | -0.44 | -0.7  | -0.48 | -0.51 |       |
| 20 | <i>IRS1</i>      | 2q36              |                                                | 0.323  | 0.199 | 0.314 | 0.22  | 0.228 | 0.104 | 0.44  | 0.499 | 0.223 | 0.277 | 0.44         | 0.321 | 0.189 | 0.239 | -0.07 | -0.75    | 0.058 | -0.39 | -0.19 | -0.26 | 0.054 | -0.27 | 0.05  | 0.117 | 0.451 | -0.01 | -0.21 | -0.48 | -0.31 | -0.23 | 0.237 | -0.02 | 0.237 | -0.11 | 0.136 | -0.13 | 0.217 | -0.01 | 0.088 | 0.168 | -0    | -0.14 |       |       |
| 21 | <i>RXRβ</i>      | 6p21.3            | SI                                             | 1.091  | 0.828 | 0.856 | 0.896 | 0.672 | 0.584 | 0.508 | 1.201 | 0.758 | 0.485 | 0.899        | 0.572 | 0.524 | 0.612 | -0.42 | 0.048    | -1.25 | 0.124 | -0.43 | -0.29 | 0.191 | 0.403 | 0.114 | -0.17 | 0.117 | -0.42 | -0.51 | 0.28  | 0.074 | -0.05 | 0.447 | -0.44 | -0.53 | 0.245 | -0.4  | 0.568 | 0.105 | -0.11 | 0.987 | 0.037 | -0.68 | -0.12 | -0.14 |       |
| 22 | <i>PTPN18</i>    | 2q21              |                                                | 0.258  | 0.231 | 0.108 | 0.15  | -0.06 | -0.12 | -0.11 | -0.05 | 0.152 | 0.024 | 0.253        | 0.886 | 0.677 | 0.758 | 0.783 | -0.44    | -1.35 | -0.46 | 0.163 | -0.1  | -0    | 0.223 | -0.04 | 0.56  | -0.07 | 0.499 | 0.228 | 0.114 | 0.037 | -0.49 | 0.128 | 0.531 | -0.05 | 0.251 | -0.71 | 0.688 | -0.04 | 0.487 | 0.982 | -0.12 | 0.167 | -0.51 | 0.037 |       |
| 23 | <i>BBS5</i>      | 2q31              |                                                | 0.313  | 0.066 | 0.136 | 0.175 | 0.034 | 0.114 | -0.53 | 0.047 | 0.538 | 0.601 | 1.01         | -0.37 | -0.48 | -0.54 | -0.46 | 0.417    | -0.75 | -0.05 | 0.194 | -0.35 | 0.471 | 0.118 | 0.633 | 0.293 | 0.289 | 0.909 | 0.642 | -0.24 | -0.37 | 0.599 | 0.885 | -0.16 | 0.114 | -0.13 | -0.19 | 0.61  | -0.05 | -0.42 | -0.1  | -0.57 | 0.32  | 2.02  | -0.02 |       |
| 24 | <i>SAMD9</i>     | 7q1.2             |                                                | 0.465  | 0.502 | 0.393 | 0.541 | 0.198 | 0.03  | 0.505 | 0.443 | 0.233 | 0.383 | 0.612        | -0.16 | -0.29 | -0.27 | -0.39 | -0.39    | -0.47 | -1.09 | -0.18 | -1.01 | -0.14 | -0.17 | 0.01  | 0.247 | 0.514 | -0.34 | -0.06 | -1.12 | 0.552 | 0.43  | 0.193 | 0.178 | 0.109 | 0.272 | 1.018 | 0.841 | -0.05 | 0.029 | 0.08  | -0.43 | -0.11 | -0.18 |       |       |
| 25 | <i>UEVLD</i>     | 11p15.1           |                                                | 0.177  | 0.105 | -0.14 | -0.17 | -0.19 | -0.17 | -0.01 | 0.653 | 0.363 | -0.37 | 0.167        |       |       |       |       |          |       |       |       |       |       |       |       |       |       |       |       |       |       |       |       |       |       |       |       |       |       |       |       |       |       |       |       |       |
