# Supplementary figures and images for: Progression risk assessments of individual non-invasive gastric neoplasms by genomic copy-number profile and mucin phenotype
Source: Springer Nature journal article supplement (doi:10.1186/s12920-015-0080-6), 2015-02-17

## Before amplification

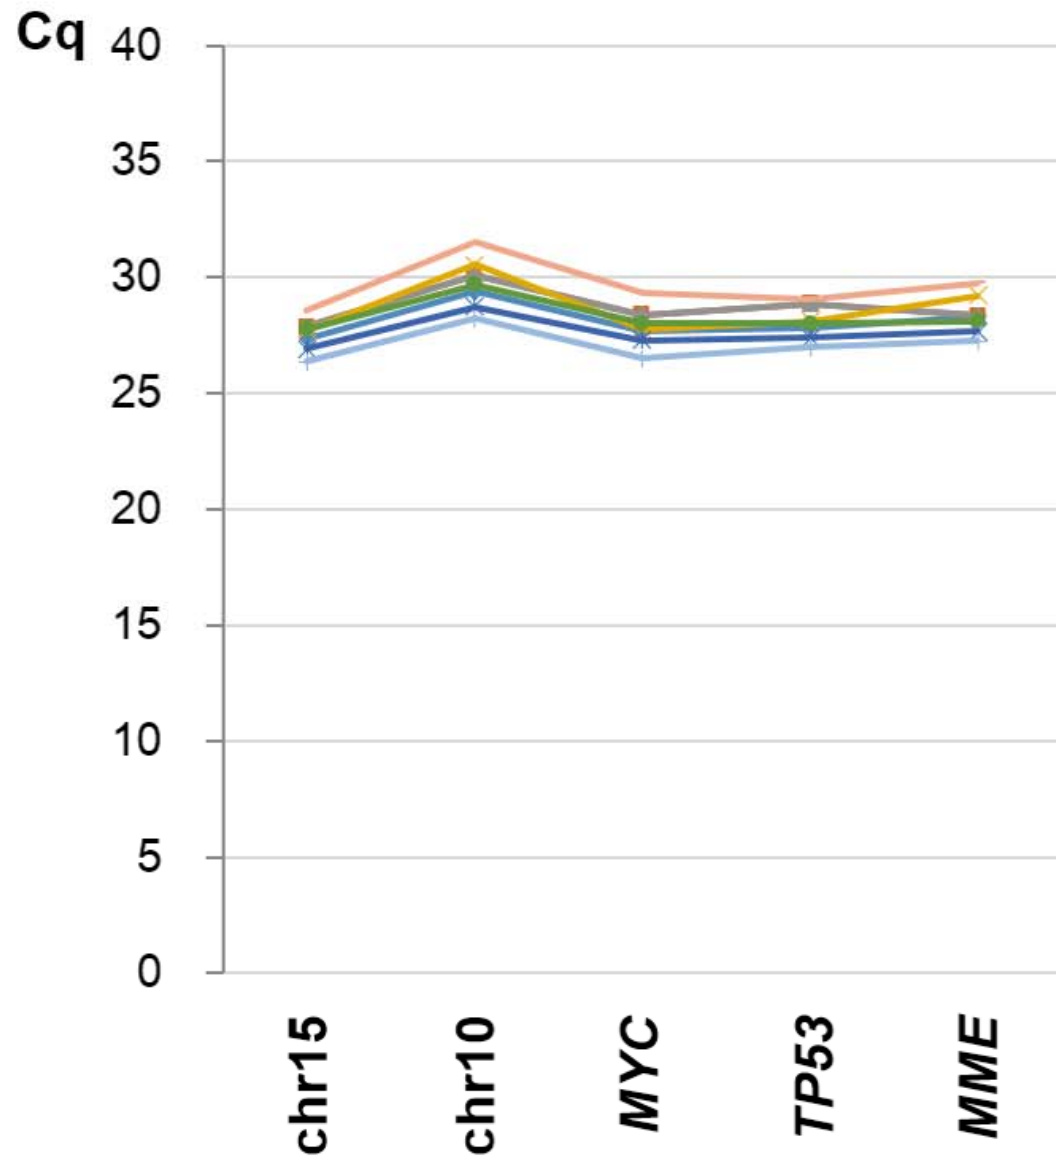

## After amplification

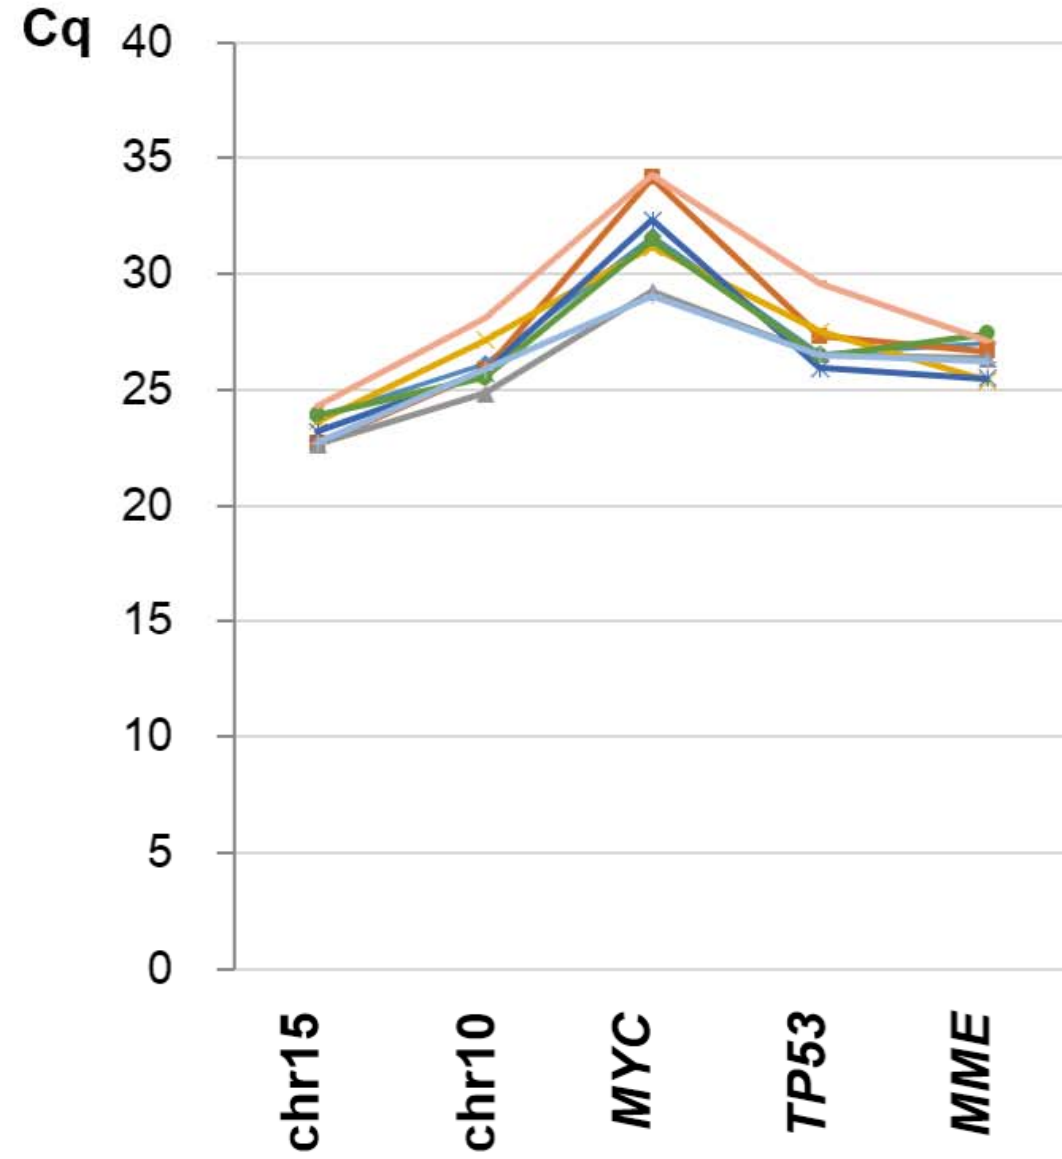

chr15: 51481794-51481853  
chr10: 72681585-72681644  
n=8

Supplement: MOESM2 [file 12920_2015_80_MOESM2_ESM.pdf]
